# Supplementary material
Source: PubMed Central journal article supplement (PMC3148308)

# S1.

**A.**

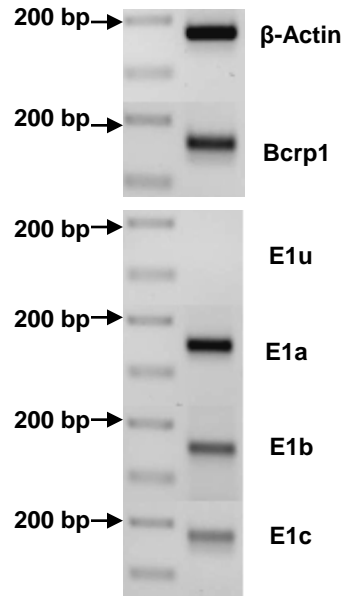

**B.**

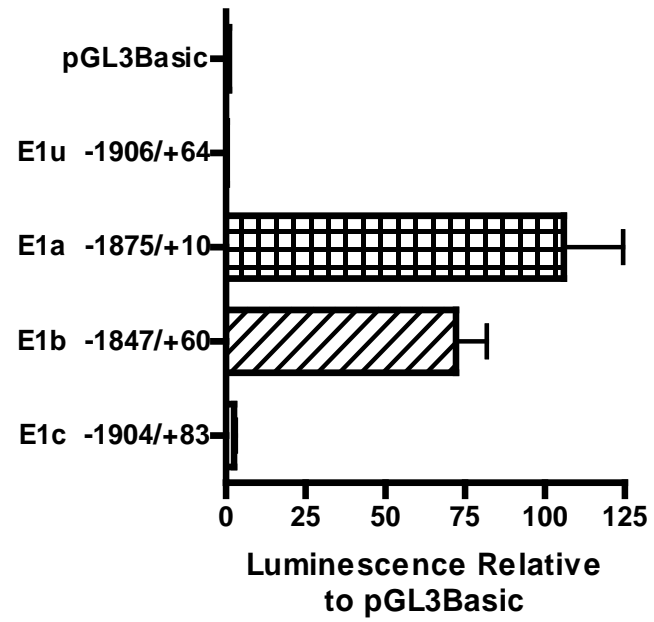

Supplement: NIHMS307491-supplement-02.pdf [file NIHMS307491-supplement-02.pdf]
